# Supplementary material for: New and Noteworthy Taxa of the Genus Dactylorhiza Necker ex Nevski (Orchidaceae Juss.) in Kazakhstan Flora and Its Response to Global Warming
Source: MDPI journal article supplement (doi:10.3390/d15030369), 2023-03-03
Supplement: s1 [file s1]

**The genus *Dactylorhiza* Necker ex Nevski (Orchidaceae Juss.) in Kazakhstan and its response for global warming**

Aidar A. Sumbembayev, Sławomir Nowak, Aleksandra Burzacka-Hinz, Adrianna Kosiróg, Dariusz L. Szlachetko

Table S1. List of localities from Kazakhstan used in the ecological niche modeling.

| Taxon        | Longitude | Latitude |
|--------------|-----------|----------|
| D. incarnata | 78,871    | 50,807   |
| D. incarnata | 67,122    | 51,757   |
| D. incarnata | 68,665    | 52,231   |
| D. incarnata | 69,014    | 51,53    |
| D. incarnata | 58,039    | 48,281   |
| D. incarnata | 57,529    | 48,752   |
| D. incarnata | 57,753    | 49,053   |
| D. incarnata | 58,022    | 49,104   |
| D. incarnata | 58,573    | 49,036   |
| D. incarnata | 58,408    | 49,66    |
| D. incarnata | 59,18     | 49,456   |
| D. incarnata | 59,475    | 49,632   |
| D. incarnata | 59,827    | 49,898   |
| D. incarnata | 55,744    | 48,534   |
| D. incarnata | 64,009    | 51,025   |
| D. incarnata | 63,798    | 50,27    |
| D. incarnata | 63,494    | 49,172   |
| D. incarnata | 75,931    | 48,185   |
| D. incarnata | 76,231    | 47,77    |
| D. incarnata | 76,719    | 48,054   |
| D. incarnata | 77,134    | 47,611   |
| D. incarnata | 77,769    | 47,401   |
| D. incarnata | 78,83     | 47,533   |
| D. incarnata | 76,328    | 48,088   |
| D. incarnata | 76,68     | 47,804   |
| D. incarnata | 77,52     | 47,555   |
| D. incarnata | 78,297    | 47,498   |
| D. incarnata | 77,429    | 43,055   |
| D. incarnata | 67,827    | 44,155   |
| D. incarnata | 68,525    | 43,753   |
| D. incarnata | 68,712    | 43,287   |
| D. incarnata | 68,281    | 42,595   |

|                           |        |        |
|---------------------------|--------|--------|
| D. salina                 | 64,263 | 50,965 |
| D. salina                 | 79,585 | 43,928 |
| D. salina                 | 79,04  | 43,889 |
| D. salina                 | 78,547 | 43,991 |
| D. salina                 | 78,104 | 44,161 |
| D. salina                 | 79,971 | 42,947 |
| D. salina                 | 71,987 | 43,015 |
| D. salina                 | 72,548 | 43,038 |
| D. salina                 | 73,479 | 43,1   |
| D. salina                 | 67,872 | 44,32  |
| D. umbrosa                | 81,248 | 50,398 |
| D. umbrosa                | 69,683 | 51,221 |
| D. umbrosa                | 59,204 | 49,226 |
| D. umbrosa                | 58,134 | 48,477 |
| D. umbrosa                | 80,067 | 47,424 |
| D. umbrosa                | 85,291 | 47,765 |
| D. majalis subsp. baltica | 77,698 | 42,983 |
