# Supplementary material for: New and Noteworthy Taxa of the Genus Dactylorhiza Necker ex Nevski (Orchidaceae Juss.) in Kazakhstan Flora and Its Response to Global Warming
Source: MDPI journal article supplement (doi:10.3390/d15030369), 2023-03-03
Supplement: s1 [file s1]

**The genus *Dactylorhiza* Necker *ex* Nevski (Orchidaceae Juss.) in Kazakhstan and its response for global warming**

Aidar A. Sumbembayev, Sławomir Nowak, Aleksandra Burzacka-Hinz, Adrianna Kosiróg,  
Dariusz L. Szlachetko

Table S2. List of GBIF Occurrence Download used in the study.

| Taxon                                   | Download date   | DOI                                                                                 |
|-----------------------------------------|-----------------|-------------------------------------------------------------------------------------|
| <i>D. incarnata</i>                     | 14 January 2021 | <a href="https://doi.org/10.15468/dl.6emh9p">https://doi.org/10.15468/dl.6emh9p</a> |
| <i>D. salina</i>                        | 14 January 2021 | <a href="https://doi.org/10.15468/dl.ubwe9s">https://doi.org/10.15468/dl.ubwe9s</a> |
| <i>D. umbrosa</i>                       | 14 January 2021 | <a href="https://doi.org/10.15468/dl.nhtf68">https://doi.org/10.15468/dl.nhtf68</a> |
| <i>D. majalis</i> subsp. <i>baltica</i> | 14 January 2021 | <a href="https://doi.org/10.15468/dl.27p7pe">https://doi.org/10.15468/dl.27p7pe</a> |
